# Supplementary material for: Efficient glycolysis of used PET bottles into a high-quality valuable monomer using a shape-engineered MnOx nanocatalyst
Source: Royal Society of Chemistry journal article supplement (doi:10.1039/d4cy00823e), 2024-01-01
Supplement: d4cy00823e1.pdf [file d4cy00823e1.pdf]

**Efficient glycolysis of used PET bottles into a high-quality valuable monomer  
using a shape-engineered MnO<sub>x</sub> nanocatalyst**

Bhattu Swapna<sup>a</sup>, Nittan Singh<sup>b,c</sup>, Suranjana Patowary<sup>d</sup>, Pankaj Bharali<sup>d</sup>, Giridhar Madras<sup>e</sup>, Putla  
Sudarsanam<sup>a,\*</sup>

<sup>a</sup>Department of Chemistry, Indian Institute of Technology Hyderabad, Kandi 502284, Telangana,  
India

<sup>b</sup>Catalysis and Inorganic Chemistry Division, CSIR-National Chemical Laboratory, Dr. Homi  
Bhabha Road, Pashan, Pune 411008, India

<sup>c</sup>Academy of Scientific and Innovative Research (AcSIR), Ghaziabad 201002, Uttar Pradesh,  
India

<sup>d</sup>Department of Chemical Sciences, Tezpur University, Napaam 784028, Assam, India

<sup>e</sup>Department of Chemical Engineering, Indian Institute of Technology Hyderabad, Kandi  
502284, Telangana, India

\*Email: sudarsanam.putla@chy.iith.ac.in

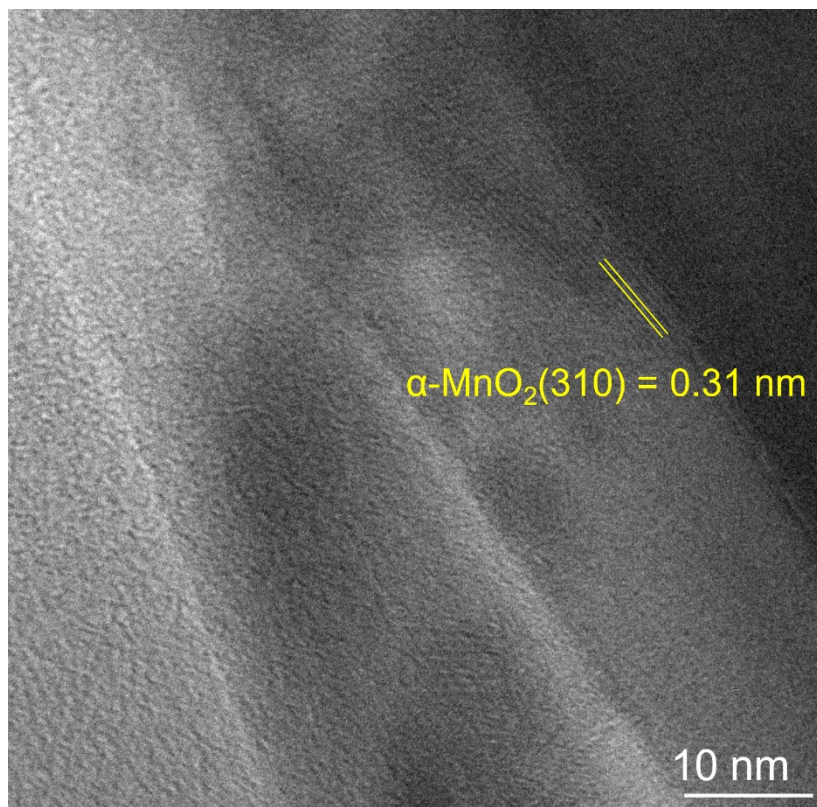

Fig. S1: High-resolution TEM image of MnO<sub>x</sub>-500 nanorod catalyst.

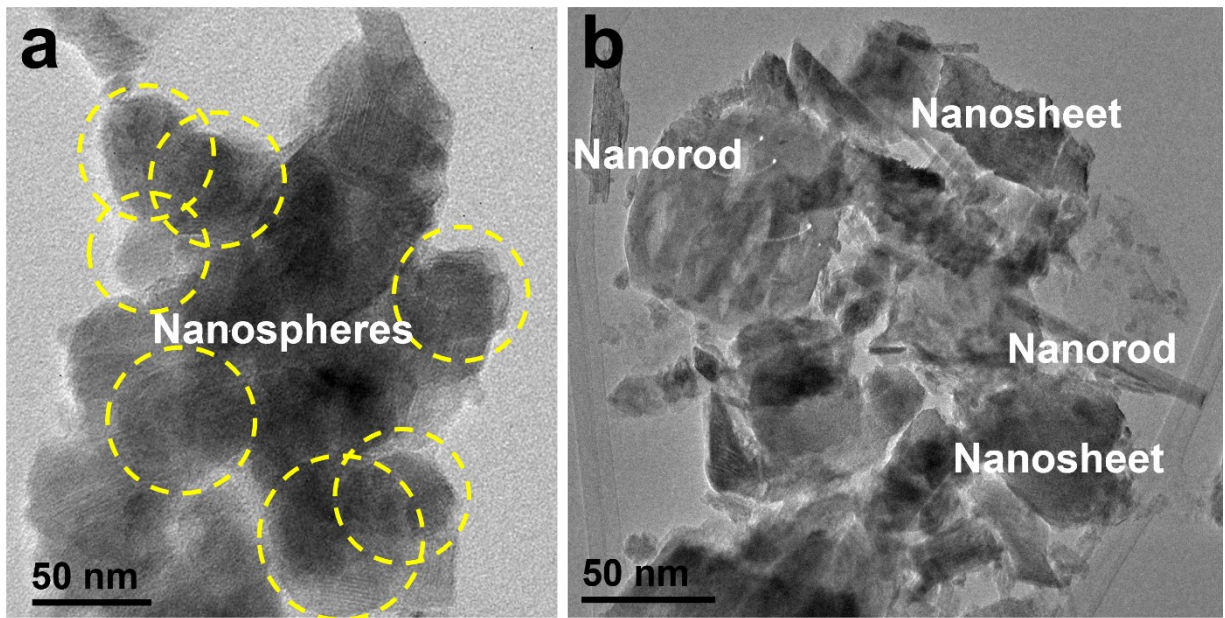

Fig. S2: TEM images of (a)  $\text{MnO}_x$ -500 nanospheres and (b) commercial  $\text{MnO}_2$ .

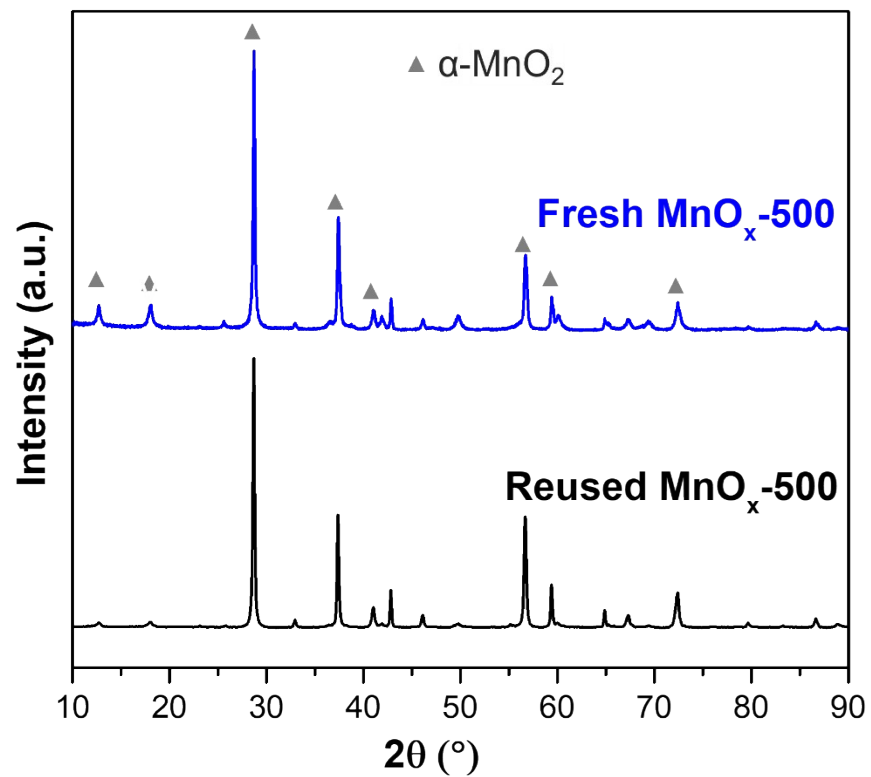

Fig. S3: Powder XRD analysis of fresh and reused  $\text{MnO}_x$ -500 catalysts.

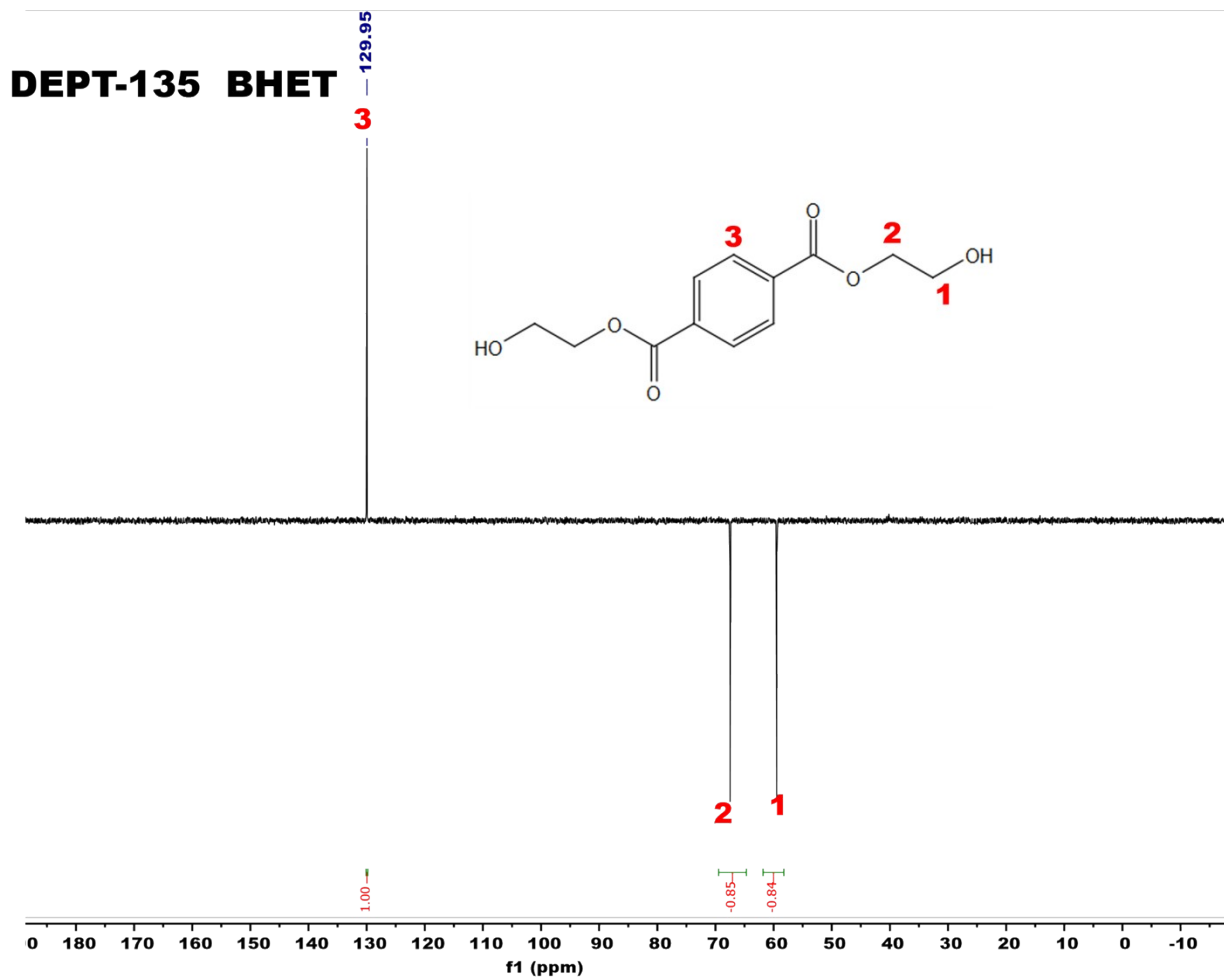

Fig. S4: DEPT 135° analysis of BHET monomer.

# <sup>1</sup>H NMR Oligomers

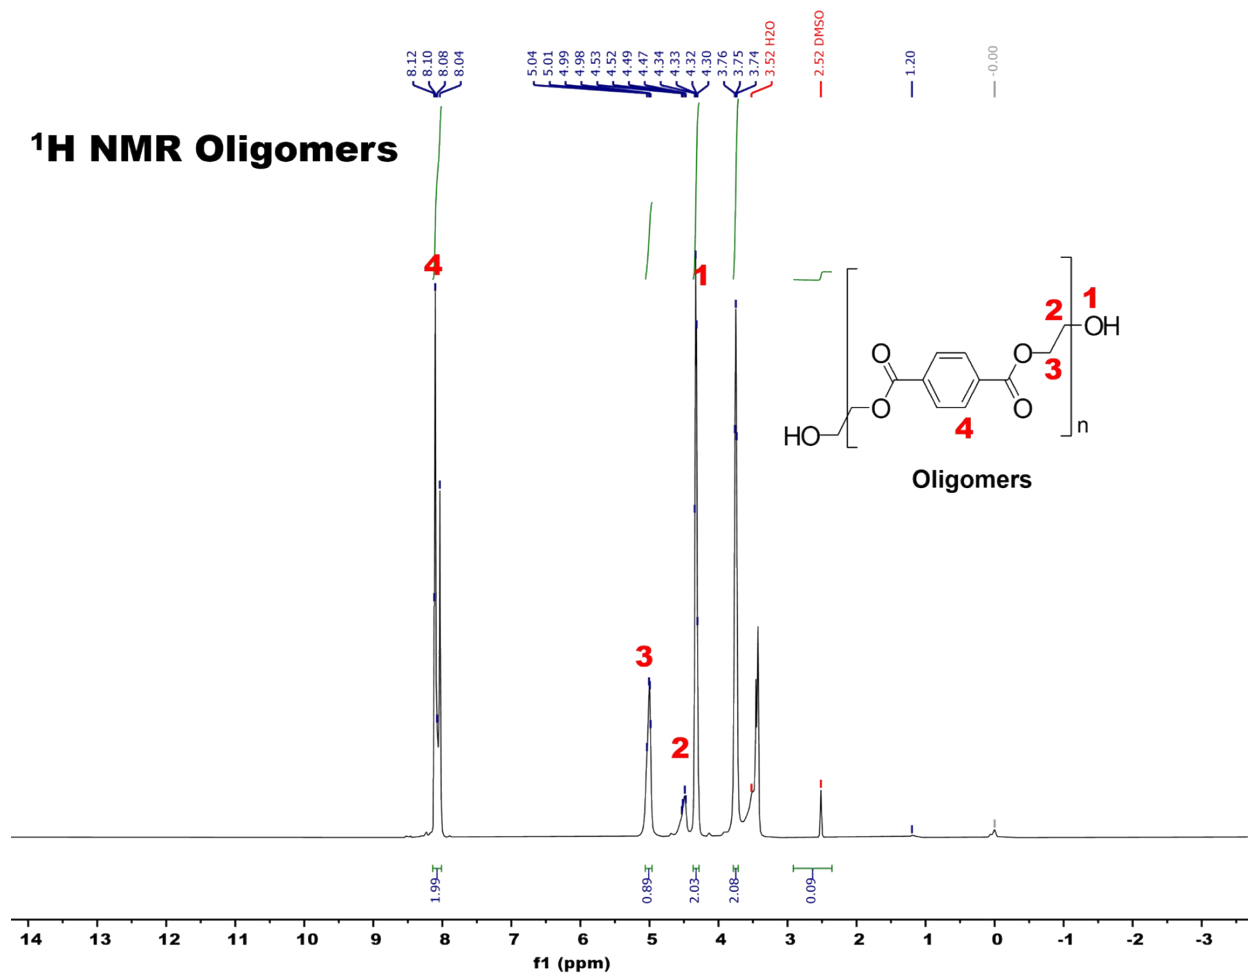

Fig. S5: <sup>1</sup>H NMR analysis of PET oligomers.

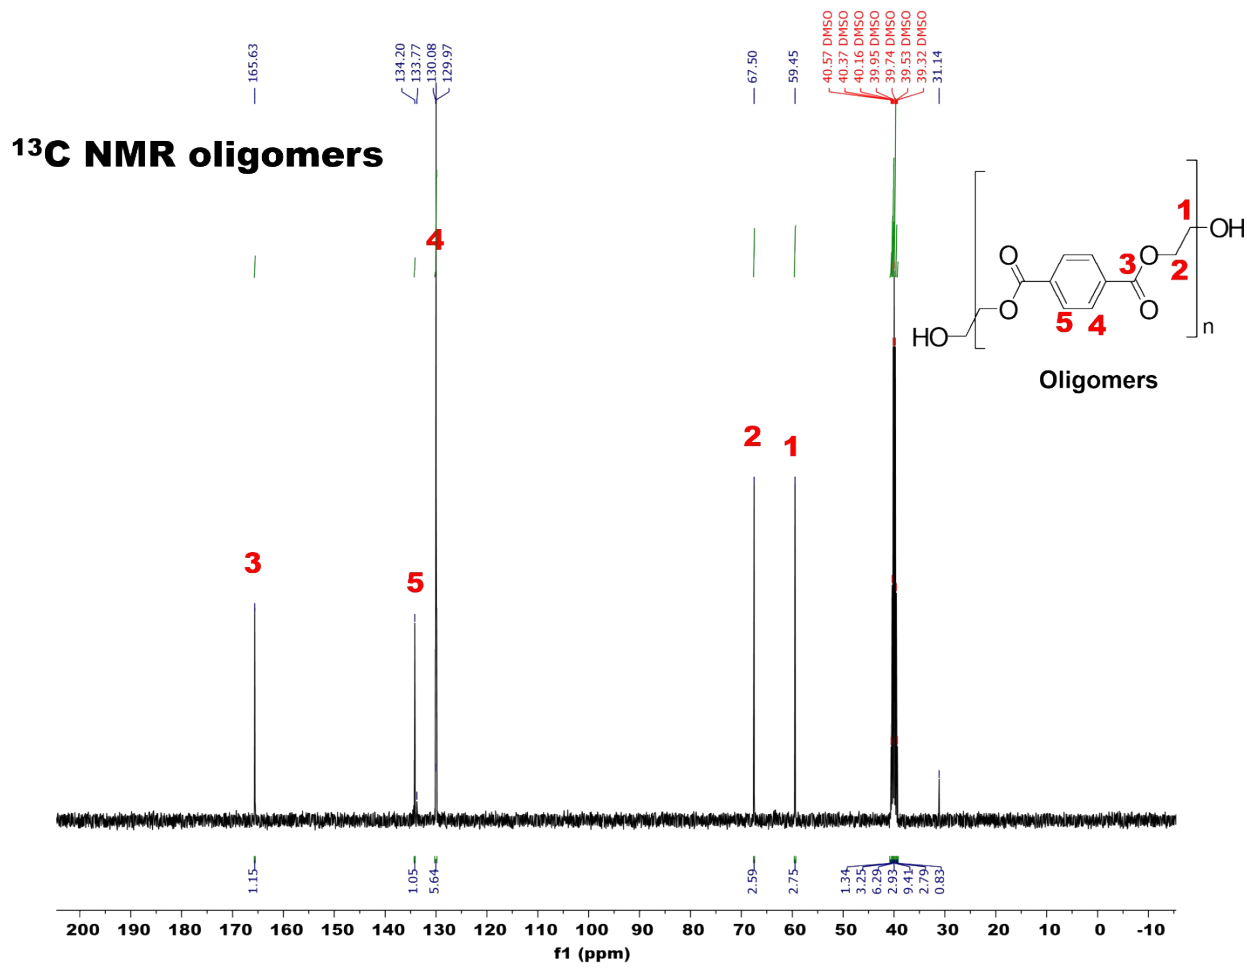

Fig. S6:  $^{13}\text{C}$  NMR analysis of PET oligomers.

## DEPT-135 Oligomers

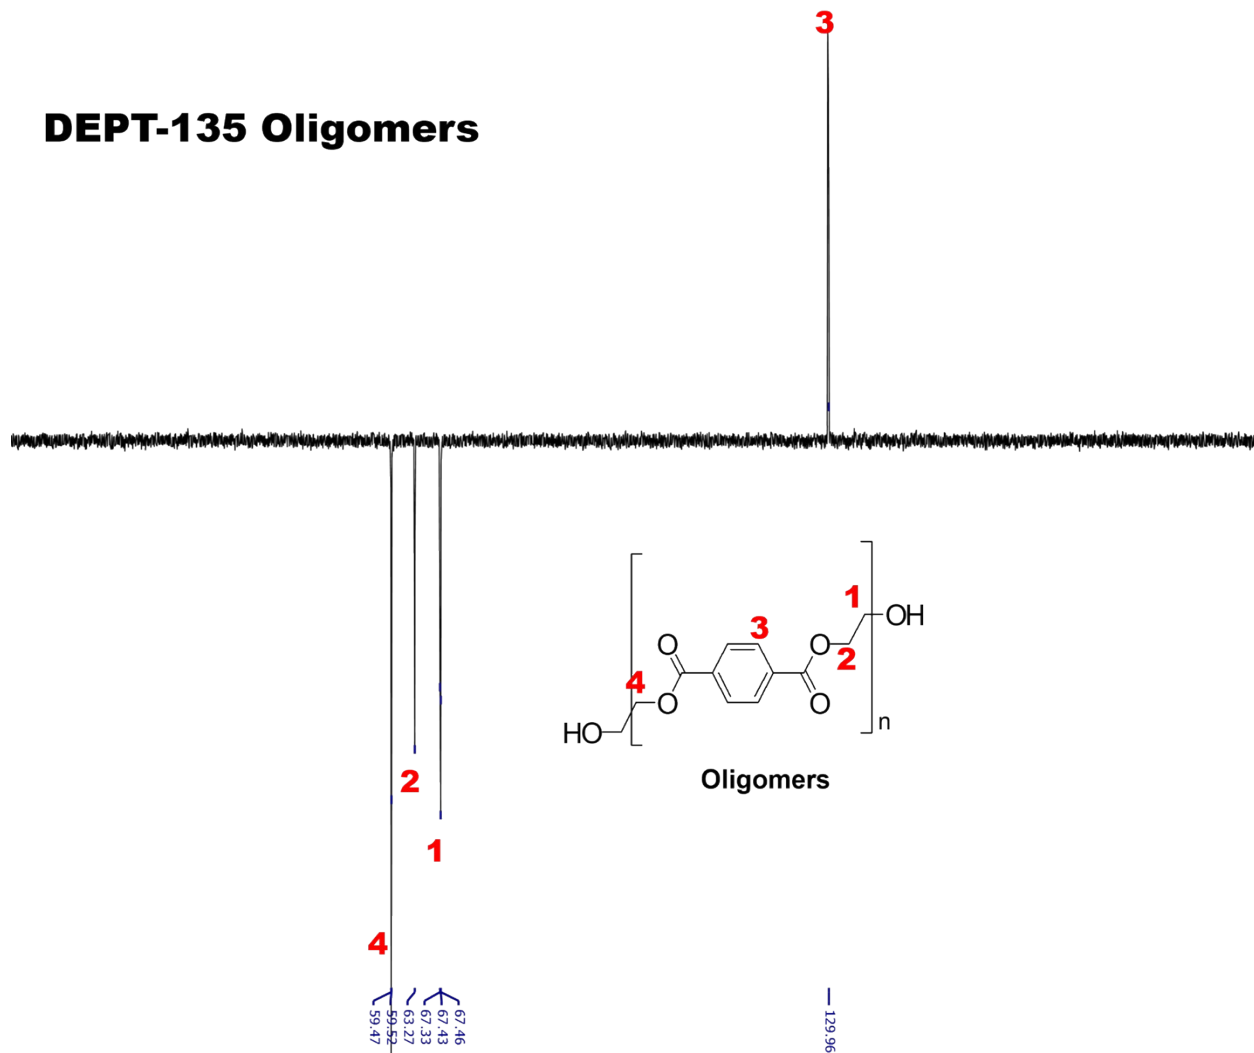

Fig. S7: DEPT 135 ° NMR analysis of PET oligomers.



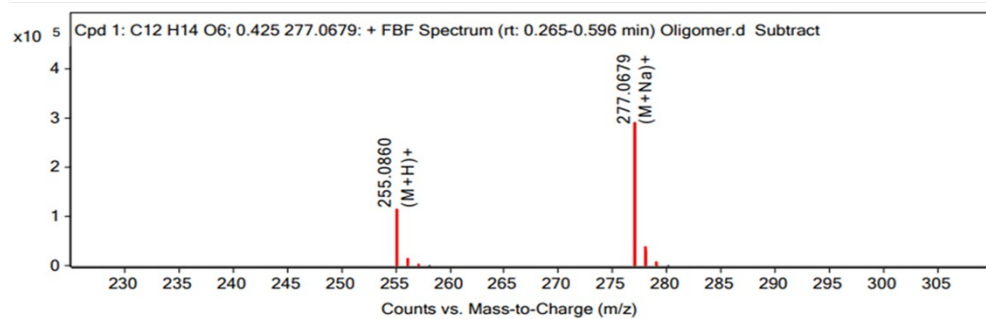

| Obs m/z | Charge | Abund  | Ion/isotope |
|---------|--------|--------|-------------|
| 255     | 1      | 114071 | (M+H)+      |
| 256     | 1      | 10762  | (M+H)+      |
| 257     | 1      | 1413   | (M+H)+      |
| 258     | 1      | 129    | (M+H)+      |
| 277     | 1      | 290022 | (M+Na)+     |
| 278     | 1      | 31581  | (M+Na)+     |
| 279     | 1      | 3446   | (M+Na)+     |
| 280     | 1      | 300    | (M+Na)+     |

Fig. S8: HR-MS analysis of BHET monomer.

Table S1: Concentration of total acid sites (estimated by NH<sub>3</sub>-TPD analysis) in various metal oxides.

| S. No. | Catalyst                                     | Concentration of total acid sites (mmol/g) |
|--------|----------------------------------------------|--------------------------------------------|
| 1      | Fresh MnO <sub>x</sub> -500 nanorod catalyst | 0.440                                      |
| 2      | Spent MnO <sub>x</sub> -500 nanorod catalyst | 0.320                                      |
| 3      | MnO <sub>x</sub> -500 nanosphere catalyst    | 0.368                                      |
| 4      | Commercial MnO <sub>2</sub>                  | 0.225                                      |
| 5      | CeO <sub>2</sub> -500                        | 0.103                                      |
| 6      | TiO <sub>2</sub> -500                        | 0.385                                      |
| 7      | Nb <sub>2</sub> O <sub>5</sub> -500          | 0.416                                      |
